# Supplementary material for: High-throughput Treg cell receptor sequencing reveals differential immune repertoires in rheumatoid arthritis with kidney deficiency
Source: PeerJ. 2023 Feb 2;11:e14837. doi: 10.7717/peerj.14837 (PMC9899432; doi:10.7717/peerj.14837)
Supplement: Supplemental Information 1 — Each data point indicates the flow cytometry of each subject. [file peerj-11-14837-s001.xls]

## Sheet: Hc vs RA
No.	Hc vs RA	total Treg	native Treg	effector Treg	activate CD4+T
1	Hc	9	5.9	13.1	8.8
2	Hc	15.1	18.1	16.5	5.2
3	Hc	6.7	8.9	8.9	14.7
4	Hc	11.6	19.6	13.5	10.2
5	Hc	12.2	17.3	13.8	12.3
6	Hc	14.9	23.8	18.5	1.7
7	Hc	8.2	12.5	9.8	1.2
8	Hc	13.6	18.1	14.3	6.6
9	Hc	3.8	7.1	5.1	5.9
10	Hc	9	16.2	11.4	3.9
11	RA	4.4	2.3	7	11.5
12	RA	8.1	5.4	11.3	12.7
13	RA	9.2	7	11.2	22.1
14	RA	9.9	8.3	14.9	8.2
15	RA	5.3	4.2	8.7	16.7
16	RA	10.5	12.6	12.1	6.6
17	RA	10.4	15.6	11.9	10.8
18	RA	7.9	13.8	8.3	5.9
19	RA	8.1	9.2	12.1	23.3
20	RA	12.6	21	15	5.9
21	RA	6.3	13.4	6.9	4.3
22	RA	7.1	7.1	9.2	8.7
23	RA	5.6	7.9	8.5	6.7
24	RA	5	4.8	9.1	25.8
25	RA	12.8	19.2	15	13.9
26	RA	9	11.9	10.2	10.5
27	RA	8.6	12.5	9.8	24.3
28	RA	8.8	11.5	9.9	10.8
29	RA	6.4	10.3	8.4	7.9
30	RA	6.9	6.4	13.6	21.3
31	RA	4.5	7.2	6.6	9.2
32	RA	12.3	8.7	14.8	13.6
33	RA	9	14.1	9.1	5.6
34	RA	8.6	9.1	10.8	14.8
35	RA	10.2	13.5	12.2	5.9
36	RA	10.3	19.8	11.1	10.5
37	RA	7.8	14.6	8.1	15.7
38	RA	9.1	13.9	10.4	10
39	RA	11.6	16.2	14.8	3.1
40	RA	12.5	16.4	14.1	17.2
41	RA	7.9	17.8	8.6	8.6
42	RA	5.3	6	7.5	10.4
43	RA	4.4	8.3	5.8	5.8
44	RA	3.3	2.2	7.2	25.2
