# Supplementary material for: High-throughput Treg cell receptor sequencing reveals differential immune repertoires in rheumatoid arthritis with kidney deficiency
Source: PeerJ. 2023 Feb 2;11:e14837. doi: 10.7717/peerj.14837 (PMC9899432; doi:10.7717/peerj.14837)
Supplement: Supplemental Information 2 — Each data point indicates the flow cytometry of each subject. [file peerj-11-14837-s002.xls]

## Sheet: KD vs Non-KD
No.	Group	total Treg	native Treg	effector Treg	activate CD4+T
11	KD	4.4	2.3	7	11.5
12	KD	8.7	5.7	11.4	12.7
13	KD	9.2	7	11.2	22.1
14	KD	9.9	8.3	14.9	8.2
15	KD	5.3	4.2	8.7	16.7
16	KD	10.5	12.6	12.1	6.6
17	KD	10.4	15.6	11.9	10.8
18	KD	7.9	13.8	8.3	5.9
19	KD	8.1	9.2	12.1	25.9
20	KD	17.8	20.9	20.5	5.9
21	KD	6.3	13.4	6.9	4.3
22	KD	7.1	7.1	9.2	8.7
23	KD	5.6	7.9	8.5	6.7
24	KD	5	4.8	9.1	25.8
25	non-KD	10.4	20	11.6	13.6
26	non-KD	8.9	16.2	8.7	9.9
27	non-KD	4.5	15.7	5.2	22.5
28	non-KD	9.2	15.1	10.6	9.8
29	non-KD	7.4	11.4	9.9	6.1
30	non-KD	19.2	22.5	25.2	12.6
31	non-KD	4.4	9.6	5.7	8.9
32	non-KD	11.5	10.7	13.9	9.8
33	non-KD	10.2	14.2	11.7	5.5
34	non-KD	9.6	11.9	12	14.2
35	non-KD	11.1	14.8	12.4	5.6
36	non-KD	12.4	21.7	12.3	10.2
37	non-KD	7.8	17.3	8	15.4
38	non-KD	10.5	15.8	11.5	9.5
39	non-KD	12.7	17.7	17.4	2.8
40	non-KD	13.8	20.6	15.9	16.5
41	non-KD	9	19.4	10	7.6
42	non-KD	5.7	11.7	7.4	10.2
43	non-KD	5	8.9	6	5.6
44	non-KD	3.3	2.2	7.2	24.3
