# Supplementary material for: High-throughput Treg cell receptor sequencing reveals differential immune repertoires in rheumatoid arthritis with kidney deficiency
Source: PeerJ. 2023 Feb 2;11:e14837. doi: 10.7717/peerj.14837 (PMC9899432; doi:10.7717/peerj.14837)
Supplement: Supplemental Information 3 — Each data point indicates the baseline characteristics of each subject, such as age, sex, CRP, ESR, etc. [file peerj-11-14837-s003.xls]

## Sheet: Baseline characteristics
No.	Age（years）	Sex	Group1 (Hc vs RA)	Group2 (KD vs non-KD)	ESR (mm/h)	CRP (mg/L)	DAS28-ESR	DAS28-CRP	Rheumatoid factor	ACPA
1	57	Female	Hc	N/A	N/A	N/A	N/A	N/A	N/A	N/A
2	43	Female	Hc	N/A	N/A	N/A	N/A	N/A	N/A	N/A
3	50	Female	Hc	N/A	N/A	N/A	N/A	N/A	N/A	N/A
4	49	Female	Hc	N/A	N/A	N/A	N/A	N/A	N/A	N/A
5	53	Female	Hc	N/A	N/A	N/A	N/A	N/A	N/A	N/A
6	48	Female	Hc	N/A	N/A	N/A	N/A	N/A	N/A	N/A
7	52	Female	Hc	N/A	N/A	N/A	N/A	N/A	N/A	N/A
8	54	Male	Hc	N/A	N/A	N/A	N/A	N/A	N/A	N/A
9	59	Female	Hc	N/A	N/A	N/A	N/A	N/A	N/A	N/A
10	65	Male	Hc	N/A	N/A	N/A	N/A	N/A	N/A	N/A
11	59	Female	RA	KD	36.8	23	7.26	6.57	＜20	＞200
12	57	Female	RA	KD	77	61.2	5.08	4.93	27.9	44.9
13	46	Female	RA	KD	65	13.2	6.0788	5.0719	196	＞200
14	63	Female	RA	KD	49	1.93	6.03156	4.65429	＜20	＜0.5
15	64	Female	RA	KD	38	8.51	7.23036	6.4549	65.2	40.9
16	59	Female	RA	KD	73	19.4	6.93109	5.97336	<20	1.2
17	36	Female	RA	KD	73	91.1	6.63259	6.2175	<20	＞200
18	51	Female	RA	KD	63	104	7.48069	7.21592	3230	66.5
19	56	Male	RA	KD	32	39.3	5.44764	5.31231	675	＞200
20	54	Female	RA	KD	32	11.3	6.9977	6.43514	32.3	＞200
21	62	Female	RA	KD	120	17.8	6.78936	5.45431	189	＞200
22	56	Female	RA	KD	90	39.4	7.17971	6.32142	126	6.2
23	49	Female	RA	KD	37	4.44	5.68438	4.72649	211	＞200
24	60	Male	RA	KD	39	16.5	6.81314	6.23904	1070	62.6
25	63	Male	RA	non-KD	42	28	6.11268	5.66854	333	＞200
26	50	Female	RA	non-KD	70	31.4	6.05395	5.29214	66	＞200
27	34	Female	RA	non-KD	56	39.5	5.51856	4.99328	381	＞200
28	48	Female	RA	non-KD	41	7.42	5.03667	4.16419	＜20	14.7
29	51	Female	RA	non-KD	31	69.9	7.34771	7.43798	41.5	＞200
30	57	Male	RA	non-KD	43	78.2	5.67041	5.57148	35.6	67.1
31	43	Male	RA	non-KD	31	22.4	5.12209	4.81328	56.5	46.2
32	60	Female	RA	non-KD	23	21.7	5.34232	5.23153	743	21.7
33	57	Female	RA	non-KD	19	25.7	5.20148	5.28285	48	16.7
34	50	Female	RA	non-KD	58	34.3	6.38515	5.78583	735	＞200
35	48	Female	RA	non-KD	40	14.1	5.28003	4.6351	<20	17
36	43	Female	RA	non-KD	30	7.06	6.7885	6.11895	24	190.6
37	54	Female	RA	non-KD	68	38.3	7.21464	6.54262	161	101
38	54	Female	RA	non-KD	65	12.8	5.67964	4.66245	34.8	200
39	60	Male	RA	non-KD	64	6.58	8.11446	6.89243	1100	90.8
40	51	Female	RA	non-KD	32	41.8	5.96555	5.85188	75.8	200
41	53	Female	RA	non-KD	30	6.85	5.13841	4.45936	220	200
42	48	Male	RA	non-KD	40	96.8	5.70613	5.73377	1140	137.6
43	44	Female	RA	non-KD	54	16.2	6.14397	5.33585	51	＞200
44	56	Female	RA	non-KD	69	27.5	4.65285	3.85494	<20	55.8
