# Supplementary material for: High-throughput Treg cell receptor sequencing reveals differential immune repertoires in rheumatoid arthritis with kidney deficiency
Source: PeerJ. 2023 Feb 2;11:e14837. doi: 10.7717/peerj.14837 (PMC9899432; doi:10.7717/peerj.14837)
Supplement: Supplemental Information 11 — Relative mRNA expression of CD25 of RA patients with KD or non-KD. [file peerj-11-14837-s011.xls]

## Sheet: CD25
Group	2^-ΔΔct
KD	1.17444
KD	0.866353
KD	0.80377
KD	0.731438
KD	0.812131
KD	0.853024
KD	1.48086
KD	1.01435
KD	1.72075
KD	0.924619
KD	0.835456
KD	0.906109
KD	1.1223
KD	0.754394
nonKD	0.948946
nonKD	1.14908
nonKD	1.29115
nonKD	1.40613
nonKD	1.20817
nonKD	1.04234
nonKD	0.962801
nonKD	1.09191
nonKD	1.05227
nonKD	1.19049
nonKD	0.864427
nonKD	1.23224
nonKD	0.638346
nonKD	1.16858
nonKD	1.14889
nonKD	0.852107
nonKD	0.82102
nonKD	1.35079
nonKD	0.94388
nonKD	0.854848
