# Supplementary material for: High-throughput Treg cell receptor sequencing reveals differential immune repertoires in rheumatoid arthritis with kidney deficiency
Source: PeerJ. 2023 Feb 2;11:e14837. doi: 10.7717/peerj.14837 (PMC9899432; doi:10.7717/peerj.14837)
Supplement: Supplemental Information 12 — Relative mRNA expression of FOXP3 of RA patients with KD or non-KD. [file peerj-11-14837-s012.xls]

## Sheet: FOXP3
Group	2^-ΔΔct
KD	0.899415
KD	1.32845
KD	1.17998
KD	1.28007
KD	0.733852
KD	1.08578
KD	0.204605
KD	1.27838
KD	1.62242
KD	1.48757
KD	0.305533
KD	0.22011
KD	1.05688
KD	1.31694
nonKD	1.07009
nonKD	1.2869
nonKD	1.34734
nonKD	1.27627
nonKD	1.63315
nonKD	1.58557
nonKD	1.44767
nonKD	1.40342
nonKD	1.25416
nonKD	1.48456
nonKD	1.28984
nonKD	0.89155
nonKD	1.55395
nonKD	1.33018
nonKD	1.09253
nonKD	1.41309
nonKD	1.80499
nonKD	1.51519
nonKD	2.09285
nonKD	1.24595
