# Supplementary material for: High-throughput Treg cell receptor sequencing reveals differential immune repertoires in rheumatoid arthritis with kidney deficiency
Source: PeerJ. 2023 Feb 2;11:e14837. doi: 10.7717/peerj.14837 (PMC9899432; doi:10.7717/peerj.14837)
Supplement: Supplemental Information 13 — Relative mRNA expression of CD127 of RA patients with KD or non-KD. [file peerj-11-14837-s013.xls]

## Sheet: CD127
Group	2^-ΔΔct
KD	0.374092
KD	0.622692
KD	0.702134
KD	1.17762
KD	1.75209
KD	2.03628
KD	1.15099
KD	0.676901
KD	1.54037
KD	1.46392
KD	0.565463
KD	0.584336
KD	0.554722
KD	0.798383
nonKD	0.307186
nonKD	0.679845
nonKD	0.788662
nonKD	0.548978
nonKD	0.698129
nonKD	1.08453
nonKD	0.808571
nonKD	1.54927
nonKD	1.08342
nonKD	1.70206
nonKD	1.41906
nonKD	0.998913
nonKD	0.746539
nonKD	0.973824
nonKD	1.57939
nonKD	1.35841
nonKD	0.640734
nonKD	0.981092
nonKD	1.93099
nonKD	1.04741
